# Supplementary figures and images for: Modeling Particle Transport in Astrophysical Outflows and Simulations of Associated Emissions from Hadronic Microquasar Jets
Source: Hindawi journal article supplement (doi:10.1155/2022/8146675), 2022-02-08

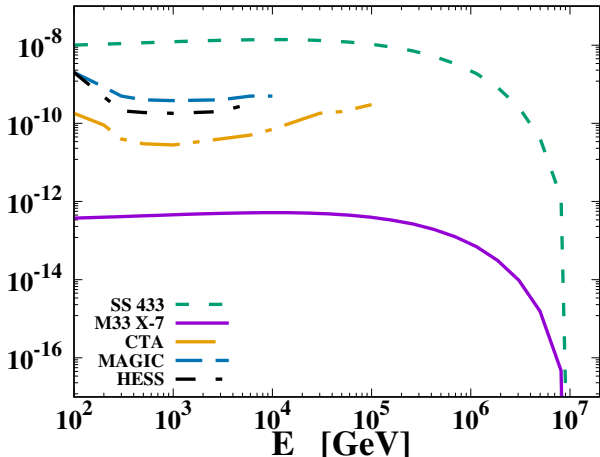

Supplement: f1 [file 8146675.f1.pdf]

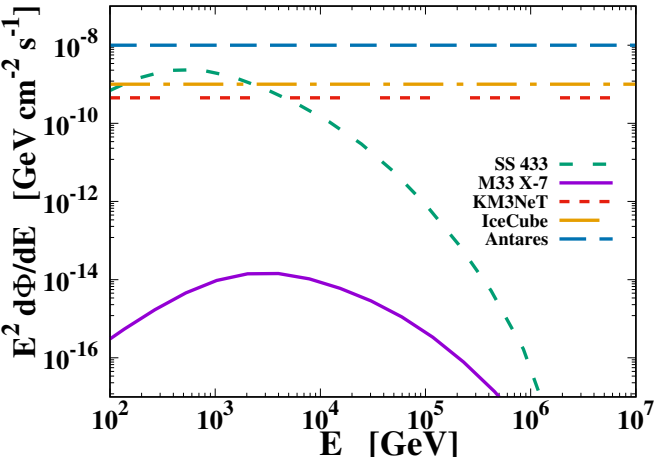

Supplement: f2 [file 8146675.f2.pdf]
